# Supplementary material for: Identification of a Novel Neuropeptide S Receptor Antagonist Scaffold Based on the SHA-68 Core
Source: Pharmaceuticals (Basel). 2021 Oct 6;14(10):1024. doi: 10.3390/ph14101024 (PMC8538004; doi:10.3390/ph14101024)
Supplement: Supplementary file 1 [file pharmaceuticals-14-01024-s001.zip › pharmaceuticals-1346916 supplementary.pdf]

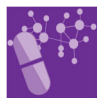

*Supplementary Materials*

# Identification of a Novel Neuropeptide S Receptor Antagonist Scaffold based on the SHA-68 Core

Allison Zarkin <sup>1</sup>, Rajwana Jahan <sup>1</sup>, Rajendra Upreti <sup>1</sup>, Yanan Zhang <sup>1</sup>, Charles McElhinny <sup>1</sup>, Rodney Snyder <sup>1</sup>, Elaine Gay <sup>1</sup>, Gabriel Jewula <sup>2</sup>, Heather Bool <sup>2</sup>, Stewart D Clark <sup>2</sup> and Scott Runyon <sup>1,\*</sup>

<sup>1</sup> Research Triangle Institute, Post Office Box 12194, Research Triangle Park, NC 27709-2194, USA

<sup>2</sup> Department of Pharmacology and Toxicology, State University of New York at Buffalo, 3435 Main Street, Buffalo, NY, 14214, USA

\* Correspondence: [srunyon@rti.org](mailto:srunyon@rti.org)

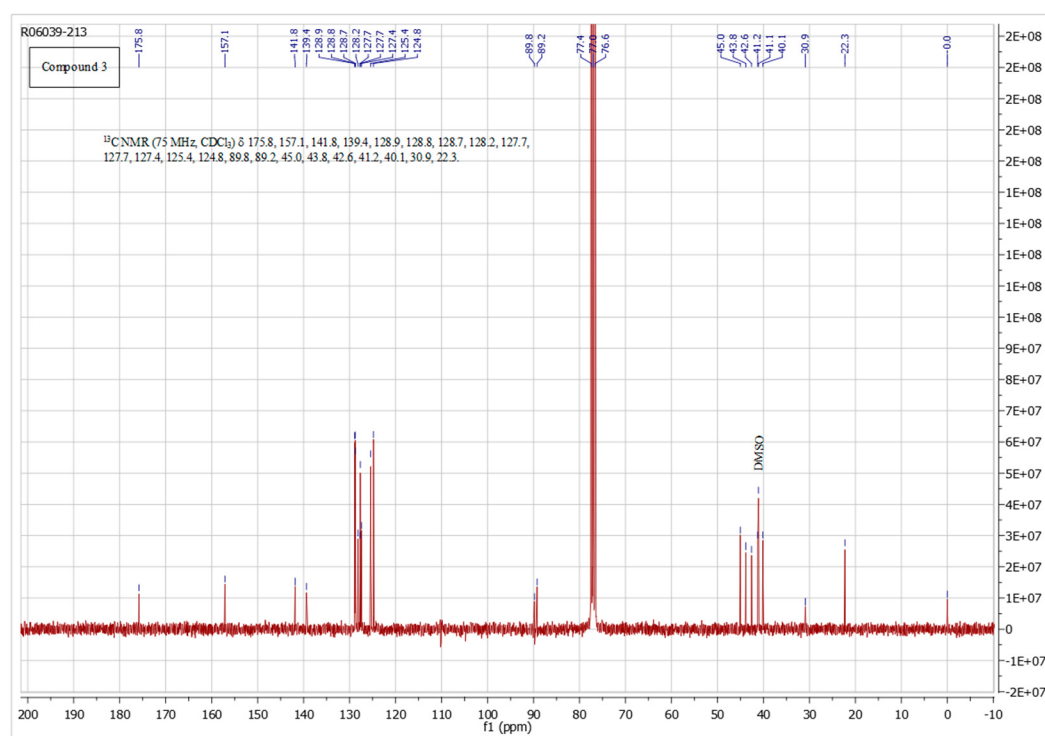Figure S1. Compound 3  $^{13}\text{C}$ -NMR.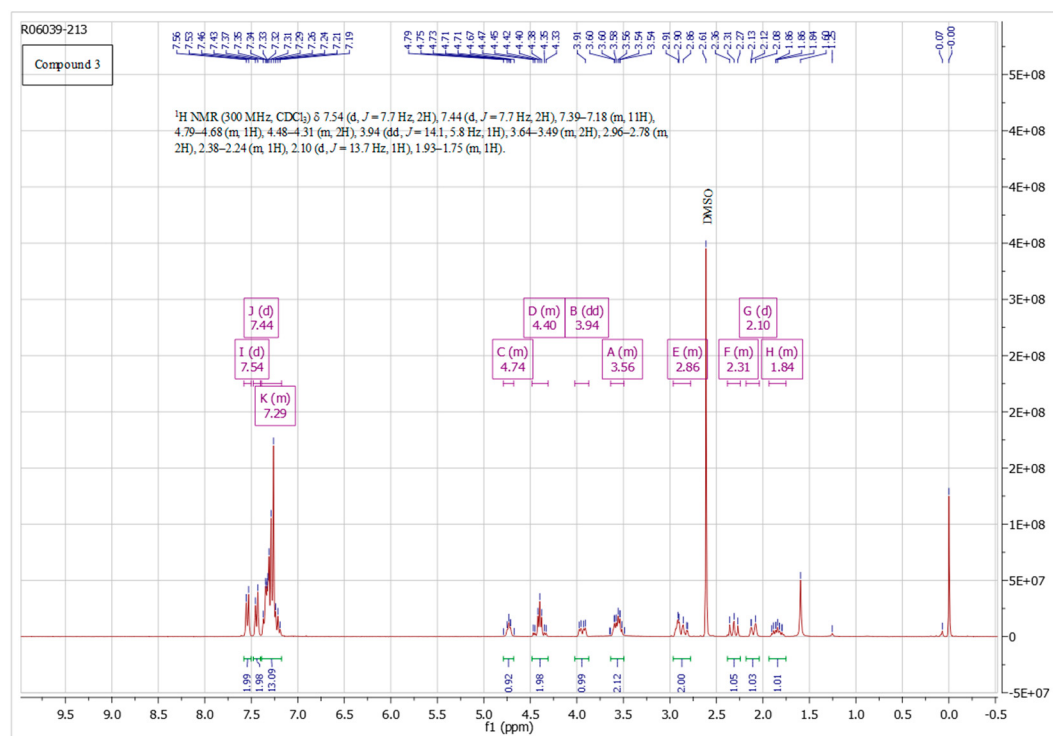Figure S2. Compound 3  $^1\text{H}$ -NMR.

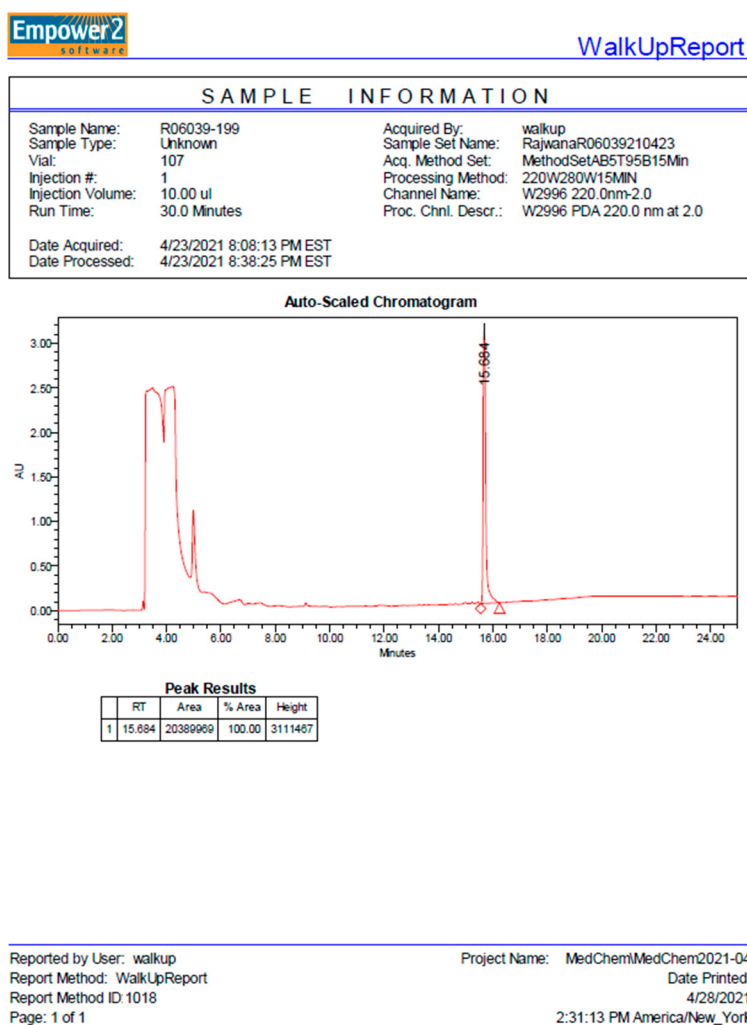

Figure S3. Compound 2.

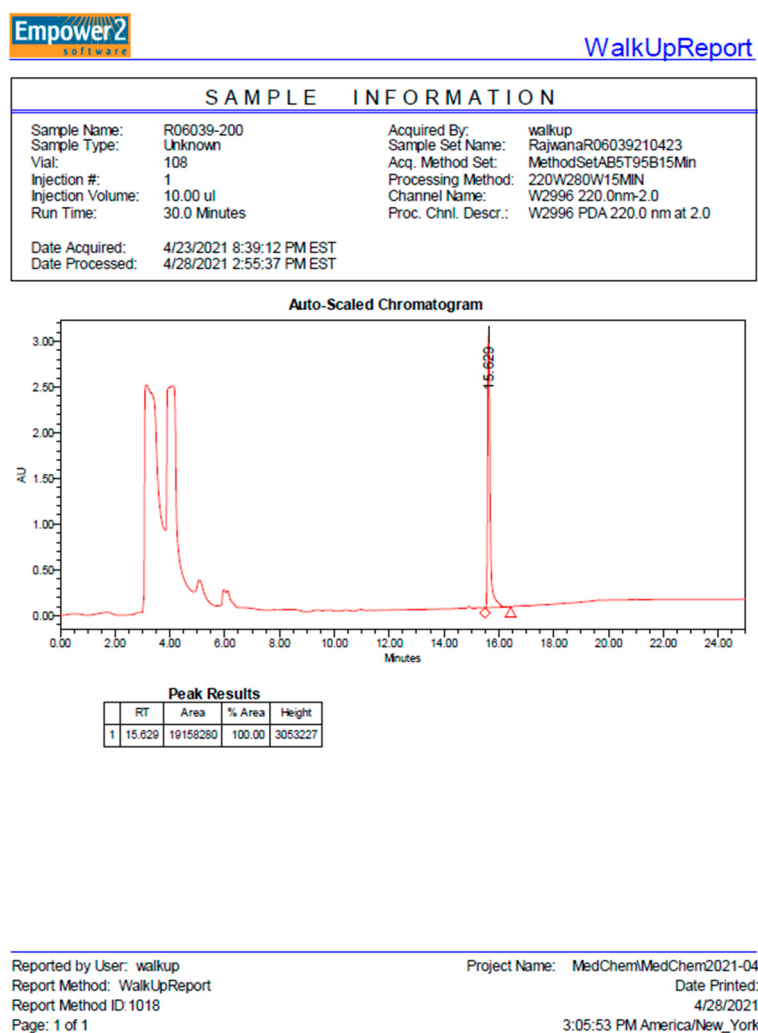

Figure S4. Compound 3.

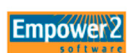

## WalkUpReport

## SAMPLE INFORMATION

|                   |                           |                     |                           |
|-------------------|---------------------------|---------------------|---------------------------|
| Sample Name:      | R06039-213                | Acquired By:        | walkup                    |
| Sample Type:      | Unknown                   | Sample Set Name:    | RajwanaR06039210423       |
| Vial:             | 113                       | Acq. Method Set:    | MethodSetAB5T95B15Min     |
| Injection #:      | 1                         | Processing Method:  | 220W280W15MIN             |
| Injection Volume: | 10.00 ul                  | Channel Name:       | W2996 220.0nm-2.0         |
| Run Time:         | 30.0 Minutes              | Proc. Chnl. Descr.: | W2996 PDA 220.0 nm at 2.0 |
| Date Acquired:    | 4/23/2021 11:14:01 PM EST |                     |                           |
| Date Processed:   | 4/28/2021 2:56:12 PM EST  |                     |                           |

## Auto-Scaled Chromatogram

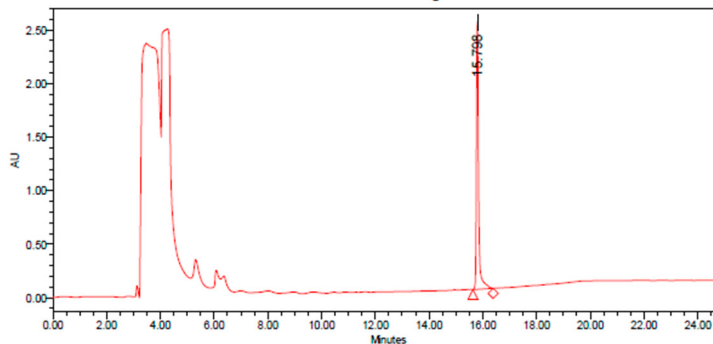

## Peak Results

|   | RT     | Area     | % Area | Height  |
|---|--------|----------|--------|---------|
| 1 | 15.798 | 14195603 | 100.00 | 2541804 |

Reported by User: walkup  
Report Method: WalkUpReport  
Report Method ID: 1018  
Page: 1 of 1

Project Name: MedChemMedChem2021-04  
Date Printed: 4/28/2021  
3:06:46 PM America/New\_York

Figure S5. Compound 4.

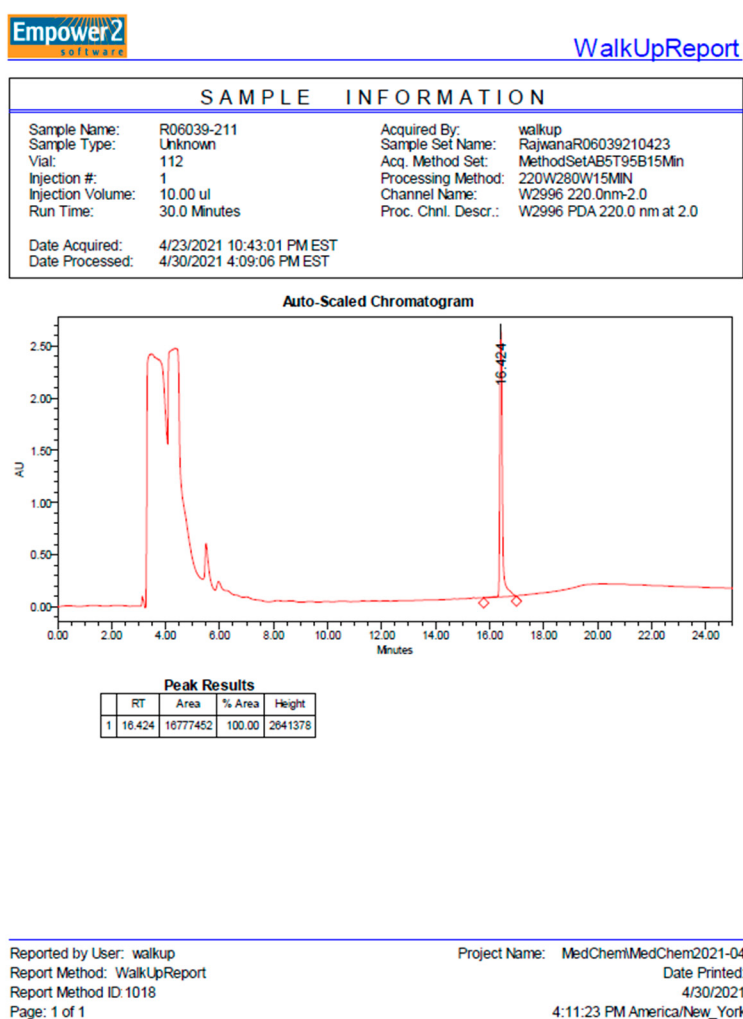

Figure S6. Compound 5.

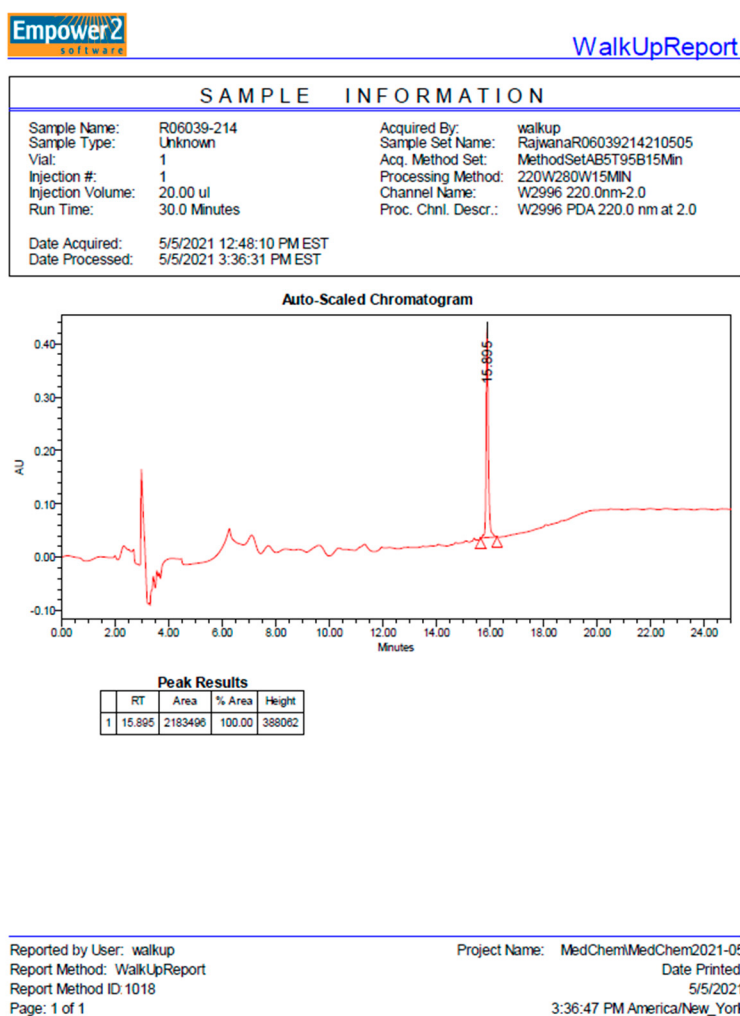

Figure S7. Compound 6.

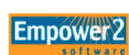

## WalkUpReport

## SAMPLE INFORMATION

|                   |                           |                     |                           |
|-------------------|---------------------------|---------------------|---------------------------|
| Sample Name:      | R06039-212                | Acquired By:        | walkup                    |
| Sample Type:      | Unknown                   | Sample Set Name:    | RajwanaR06039212210429    |
| Vial:             | 46                        | Acq. Method Set:    |                           |
| Injection #:      | 1                         | Processing Method:  | 220W280W15MIN             |
| Injection Volume: | 20.00 ul                  | Channel Name:       | W2996 220.0nm-2.0         |
| Run Time:         | 30.0 Minutes              | Proc. Chnl. Descr.: | W2996 PDA 220.0 nm at 2.0 |
| Date Acquired:    | 4/29/2021 12:01:26 PM EST |                     |                           |
| Date Processed:   | 4/29/2021 2:20:42 PM EST  |                     |                           |

## Auto-Scaled Chromatogram

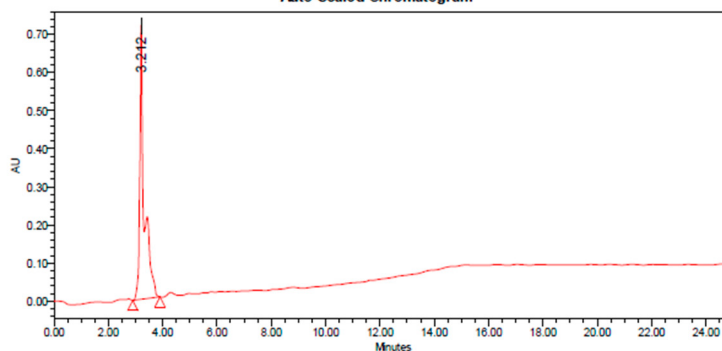

## Peak Results

| RT      | Area    | % Area | Height |
|---------|---------|--------|--------|
| 1 3.212 | 8080850 | 100.00 | 704970 |

Reported by User: walkup  
Report Method: WalkUpReport  
Report Method ID 1018  
Page: 1 of 1

Project Name: MedChemMedChem2021-04  
Date Printed: 4/30/2021  
3:59:59 PM America/New\_York

Figure S8. Compound 7.

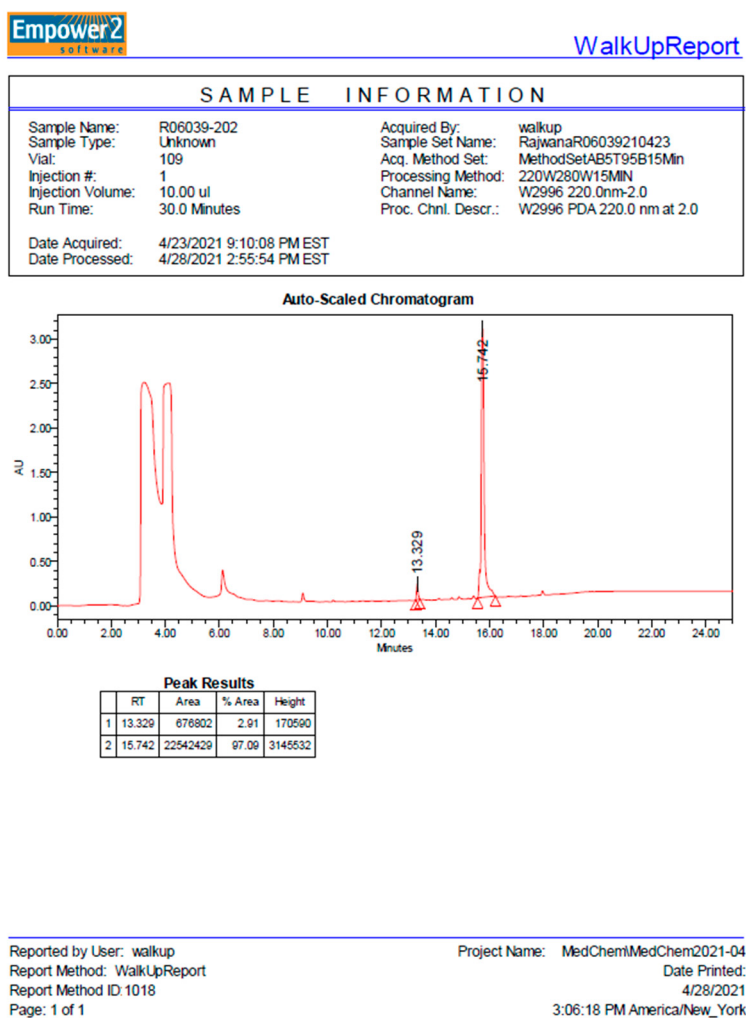

Figure S9. Compound 8.

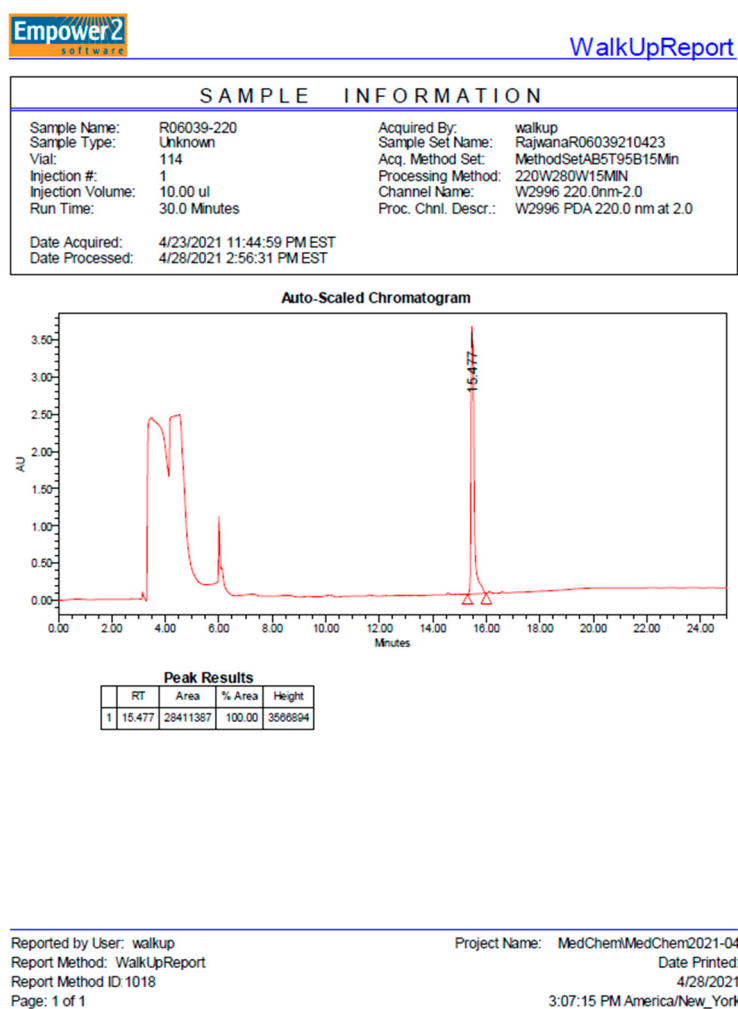

Figure S10. Compound 9.

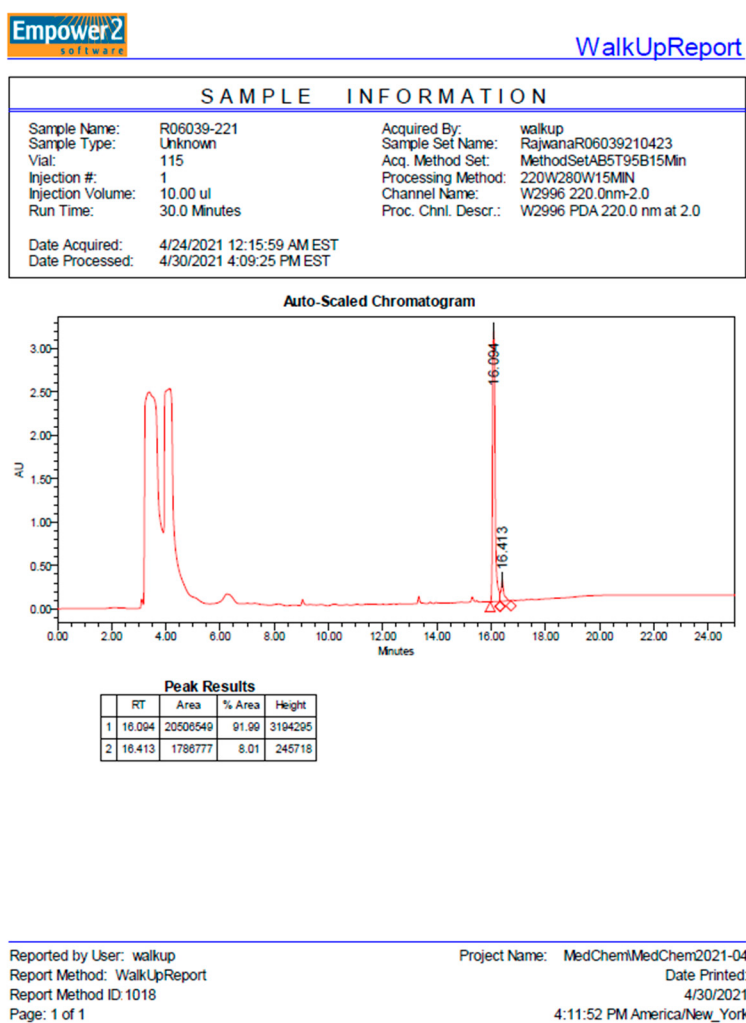

Figure S11. Compound 10.

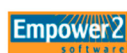

## WalkUpReport

## SAMPLE INFORMATION

|                   |                          |                     |                           |
|-------------------|--------------------------|---------------------|---------------------------|
| Sample Name:      | R06039-233               | Acquired By:        | walkup                    |
| Sample Type:      | Unknown                  | Sample Set Name:    | RajwanaR06039210423       |
| Vial:             | 11                       | Acq. Method Set:    | MethodSetAB5T95B15Min     |
| Injection #:      | 1                        | Processing Method:  | 220W280W15MIN             |
| Injection Volume: | 10.00 ul                 | Channel Name:       | W2996 220.0nm-2.0         |
| Run Time:         | 30.0 Minutes             | Proc. Chnl. Descr.: | W2996 PDA 220.0 nm at 2.0 |
| Date Acquired:    | 4/24/2021 3:22:05 AM EST |                     |                           |
| Date Processed:   | 4/28/2021 2:48:39 PM EST |                     |                           |

## Auto-Scaled Chromatogram

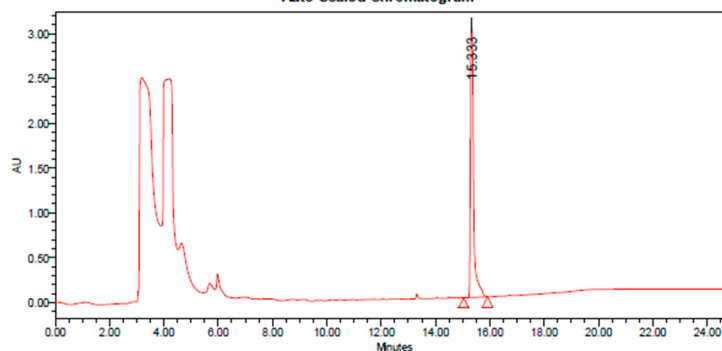

## Peak Results

|   | RT     | Area     | % Area | Height  |
|---|--------|----------|--------|---------|
| 1 | 15.333 | 24465020 | 100.00 | 3042853 |

Reported by User: walkup  
Report Method: WalkUpReport  
Report Method ID: 1018  
Page: 1 of 1

Project Name: MedChemMedChem2021-04  
Date Printed: 4/28/2021  
3:01:09 PM America/New\_York

Figure S12. Compound 11.

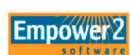

## WalkUpReport

## SAMPLE INFORMATION

|                   |                           |                     |                           |
|-------------------|---------------------------|---------------------|---------------------------|
| Sample Name:      | R06039-224                | Acquired By:        | walkup                    |
| Sample Type:      | Unknown                   | Sample Set Name:    | RajwanaR06039210423       |
| Vial:             | 116                       | Acq. Method Set:    | MethodSetAB5T95B15Min     |
| Injection #:      | 1                         | Processing Method:  | 220W280W15MIN             |
| Injection Volume: | 10.00 ul                  | Channel Name:       | W2996 220.0nm-2.0         |
| Run Time:         | 30.0 Minutes              | Proc. Chnl. Descr.: | W2996 PDA 220.0 nm at 2.0 |
| Date Acquired:    | 4/24/2021 12:46:53 AM EST |                     |                           |
| Date Processed:   | 4/24/2021 1:17:06 AM EST  |                     |                           |

## Auto-Scaled Chromatogram

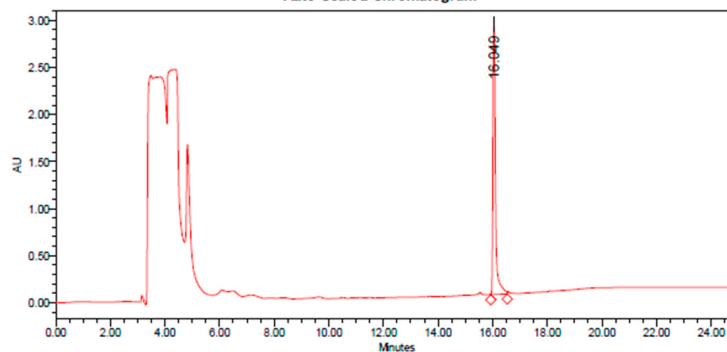

## Peak Results

|   | RT     | Area     | % Area | Height  |
|---|--------|----------|--------|---------|
| 1 | 16.049 | 19125876 | 100.00 | 2934973 |

Reported by User: walkup  
Report Method: WalkUpReport  
Report Method ID: 1018  
Page: 1 of 1

Project Name: MedChemMedChem2021-04  
Date Printed: 4/28/2021  
2:41:04 PM America/New\_York

Figure S13. Compound 12

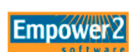

## WalkUpReport

## SAMPLE INFORMATION

|                   |                          |                     |                           |
|-------------------|--------------------------|---------------------|---------------------------|
| Sample Name:      | R06039-225               | Acquired By:        | walkup                    |
| Sample Type:      | Unknown                  | Sample Set Name:    | RajwanaR06039210423       |
| Vial:             | 117                      | Acq. Method Set:    | MethodSetAB5T95B15Min     |
| Injection #:      | 1                        | Processing Method:  | 220W280W15MIN             |
| Injection Volume: | 10.00 ul                 | Channel Name:       | W2996 220.0nm-2.0         |
| Run Time:         | 30.0 Minutes             | Proc. Chnl. Descr.: | W2996 PDA 220.0 nm at 2.0 |
| Date Acquired:    | 4/24/2021 1:17:51 AM EST |                     |                           |
| Date Processed:   | 4/24/2021 1:48:03 AM EST |                     |                           |

## Auto-Scaled Chromatogram

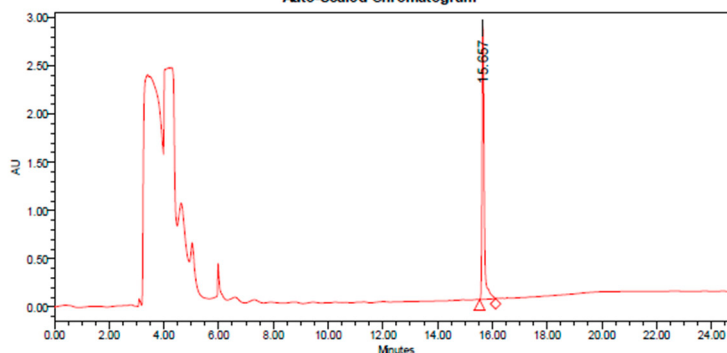

## Peak Results

|   | RT     | Area     | % Area | Height  |
|---|--------|----------|--------|---------|
| 1 | 15.657 | 15401149 | 100.00 | 2888391 |

Reported by User: walkup  
Report Method: WalkUpReport  
Report Method ID: 1018  
Page: 1 of 1

Project Name: MedChemMedChem2021-04  
Date Printed: 4/28/2021  
2:43:46 PM America/New\_York

Figure S14. Compound 13.

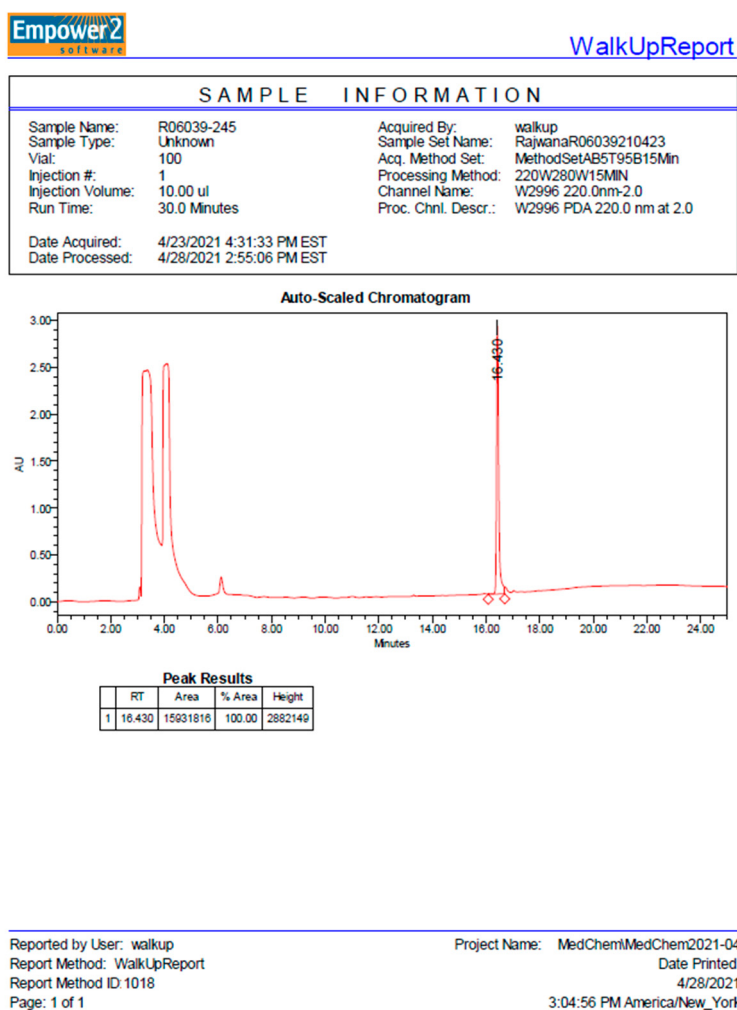

Figure S15. Compound 15.

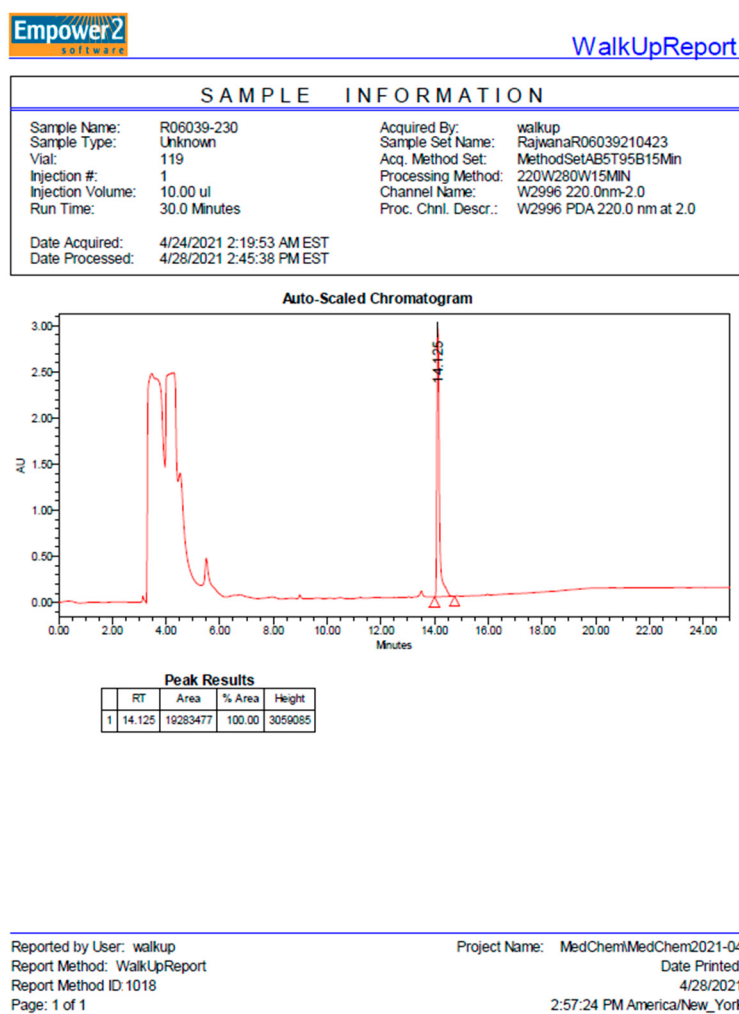

Figure S16. Compound 16.

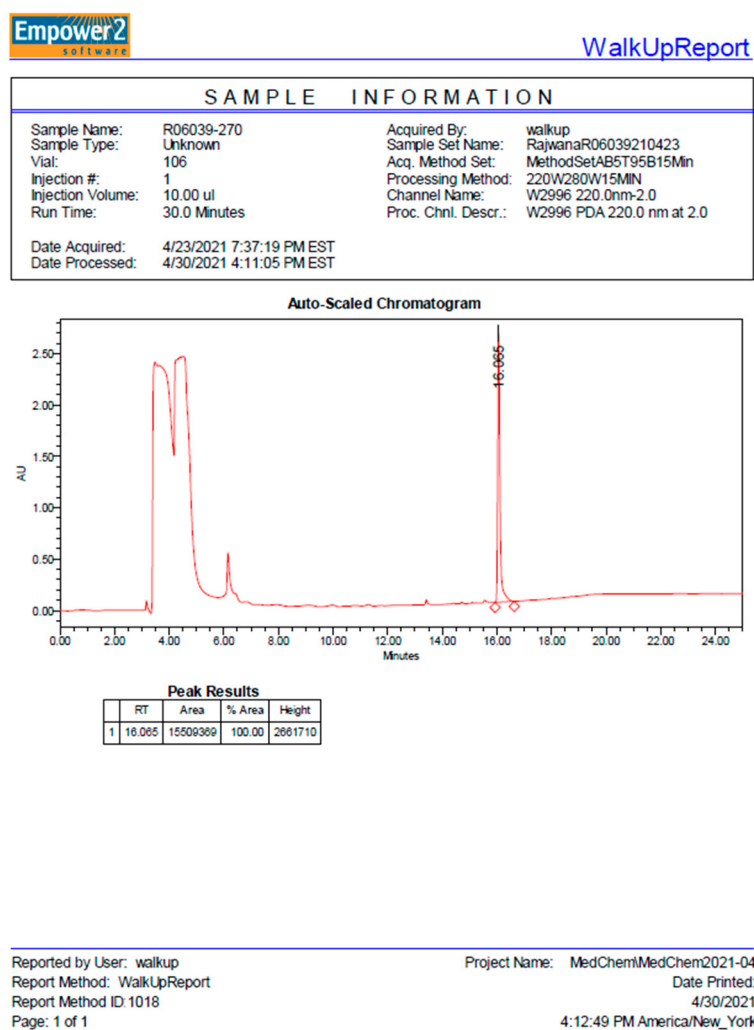

Figure S17. Compound 17.

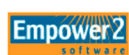

## WalkUpReport

## SAMPLE INFORMATION

|                   |                          |                     |                           |
|-------------------|--------------------------|---------------------|---------------------------|
| Sample Name:      | R06039-231               | Acquired By:        | walkup                    |
| Sample Type:      | Unknown                  | Sample Set Name:    | RajwanaR06039210423       |
| Vial:             | 120                      | Acq. Method Set:    | MethodSetAB5T95B15Min     |
| Injection #:      | 1                        | Processing Method:  | 220W280W15MIN             |
| Injection Volume: | 10.00 ul                 | Channel Name:       | W2996 220.0nm-2.0         |
| Run Time:         | 30.0 Minutes             | Proc. Chnl. Descr.: | W2996 PDA 220.0 nm at 2.0 |
| Date Acquired:    | 4/24/2021 2:50:49 AM EST |                     |                           |
| Date Processed:   | 4/28/2021 2:47:59 PM EST |                     |                           |

## Auto-Scaled Chromatogram

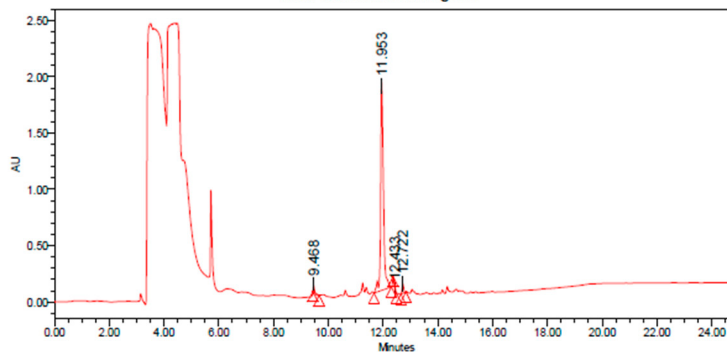

## Peak Results

|   | RT     | Area     | % Area | Height  |
|---|--------|----------|--------|---------|
| 1 | 9.468  | 231154   | 1.69   | 56390   |
| 2 | 11.953 | 12998008 | 94.85  | 1868951 |
| 3 | 12.433 | 125353   | 0.91   | 33885   |
| 4 | 12.722 | 349655   | 2.55   | 83931   |

Reported by User: walkup  
Report Method: WalkUpReport  
Report Method ID: 1018  
Page: 1 of 1

Project Name: MedChemMedChem2021-04  
Date Printed: 4/28/2021  
3:00:30 PM America/New\_York

Figure S18. Compound 18.

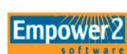

## WalkUpReport

## SAMPLE INFORMATION

|                   |                          |                     |                           |
|-------------------|--------------------------|---------------------|---------------------------|
| Sample Name:      | R06039-240               | Acquired By:        | walkup                    |
| Sample Type:      | Unknown                  | Sample Set Name:    | RajwanaR06039210423       |
| Vial:             | 14                       | Acq. Method Set:    | MethodSetAB5T95B15Min     |
| Injection #:      | 1                        | Processing Method:  | 220W280W15MIN             |
| Injection Volume: | 10.00 ul                 | Channel Name:       | W2996 220.0nm-2.0         |
| Run Time:         | 30.0 Minutes             | Proc. Chnl. Descr.: | W2996 PDA 220.0 nm at 2.0 |
| Date Acquired:    | 4/24/2021 4:54:59 AM EST |                     |                           |
| Date Processed:   | 4/28/2021 3:02:59 PM EST |                     |                           |

## Auto-Scaled Chromatogram

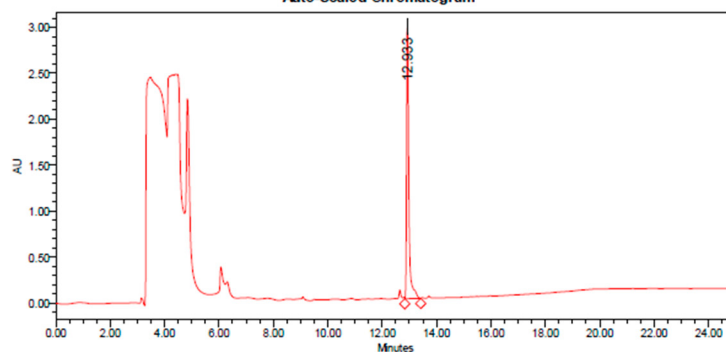

## Peak Results

|   | RT     | Area     | % Area | Height  |
|---|--------|----------|--------|---------|
| 1 | 12.933 | 17573821 | 100.00 | 3040557 |

Reported by User: walkup  
Report Method: WalkUpReport  
Report Method ID: 1018  
Page: 1 of 1

Project Name: MedChemMedChem2021-04  
Date Printed: 4/28/2021  
3:08:12 PM America/New\_York

Figure S19. Compound 19.

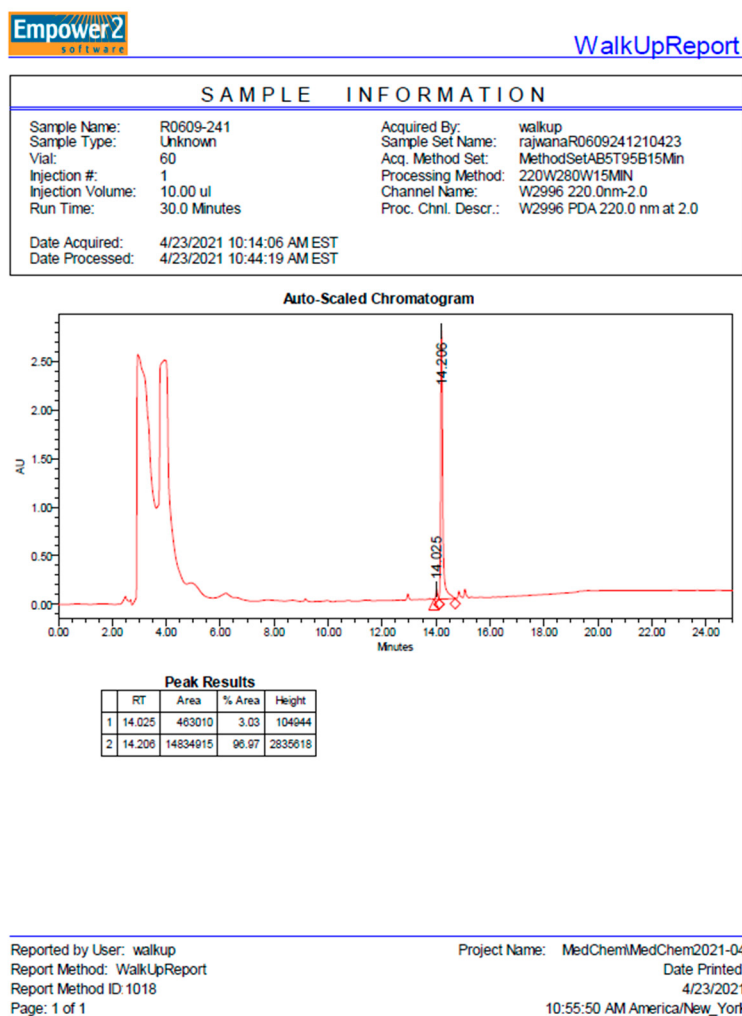

Figure S20. Compound 20.

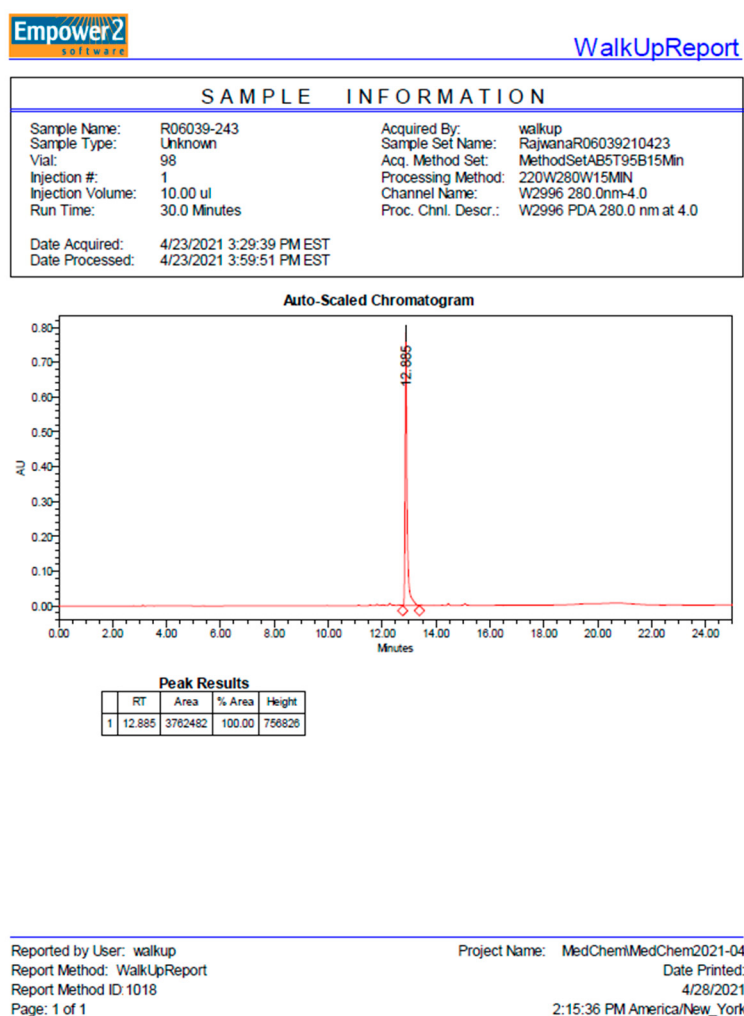

Figure S21. Compound 21.

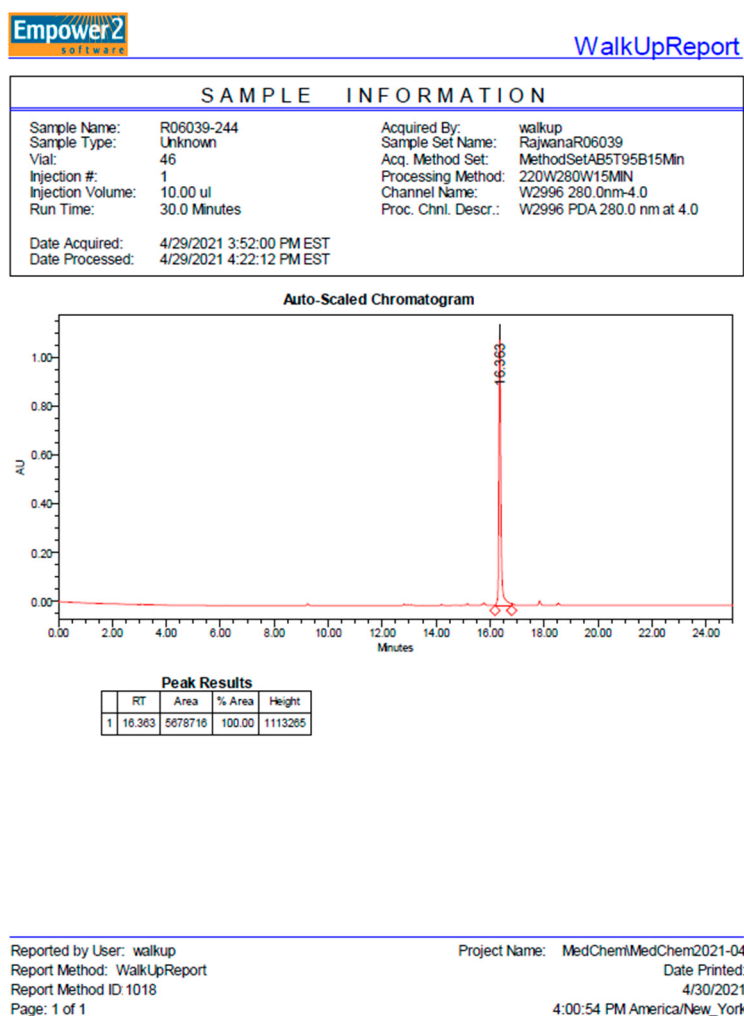

Figure S22. Compound 22.

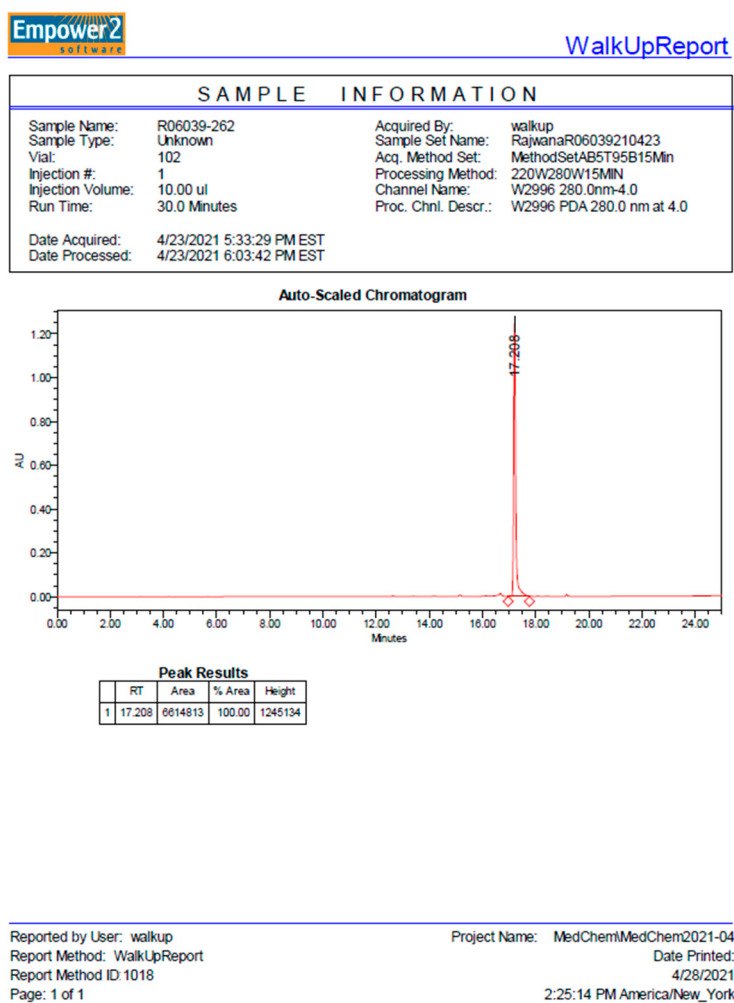

**Figure S23.** Compound 23.

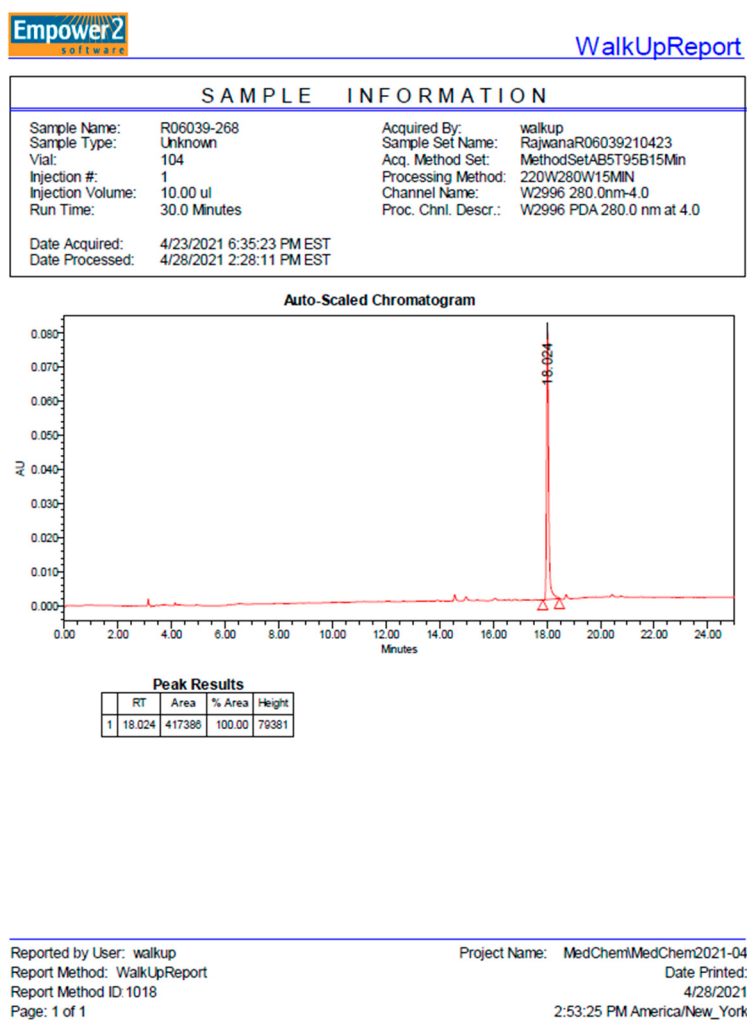

Figure S24. Compound 24.

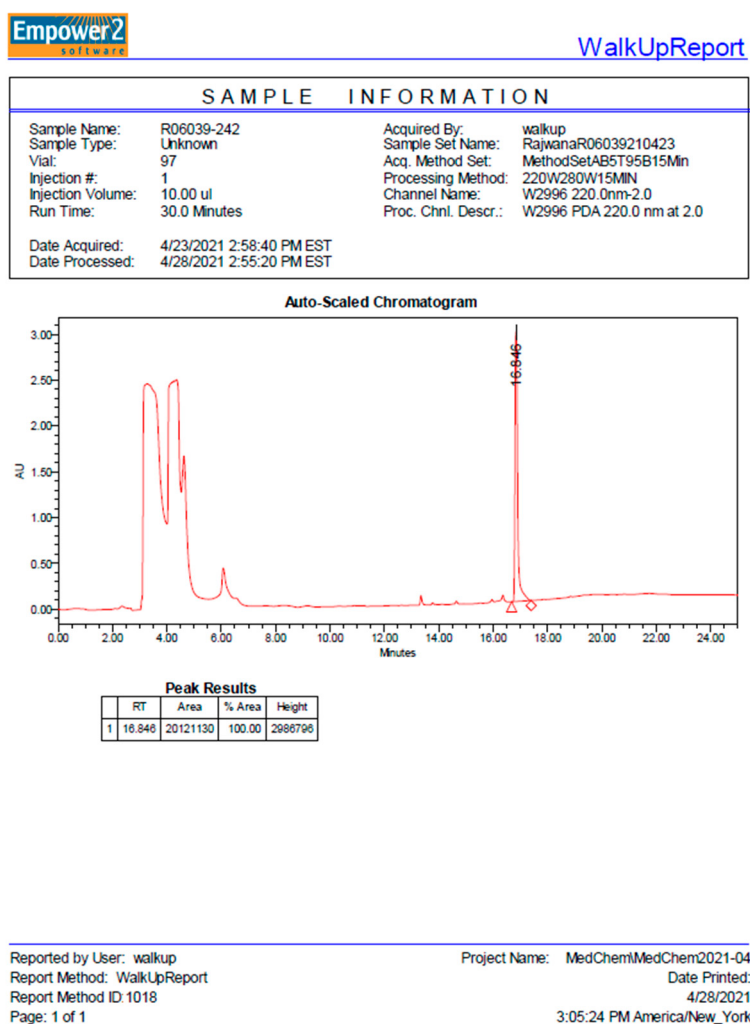

Figure S25. Compound 25.

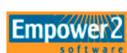

## WalkUpReport

## SAMPLE INFORMATION

|                   |                          |                     |                           |
|-------------------|--------------------------|---------------------|---------------------------|
| Sample Name:      | R06039-238               | Acquired By:        | walkup                    |
| Sample Type:      | Unknown                  | Sample Set Name:    | RajwanaR06039210423       |
| Vial:             | 13                       | Acq. Method Set:    | MethodSetAB5T95B15Min     |
| Injection #:      | 1                        | Processing Method:  | 220W280W15MIN             |
| Injection Volume: | 10.00 ul                 | Channel Name:       | W2996 220.0nm-2.0         |
| Run Time:         | 30.0 Minutes             | Proc. Chnl. Descr.: | W2996 PDA 220.0 nm at 2.0 |
| Date Acquired:    | 4/24/2021 4:23:59 AM EST |                     |                           |
| Date Processed:   | 4/28/2021 2:49:58 PM EST |                     |                           |

## Auto-Scaled Chromatogram

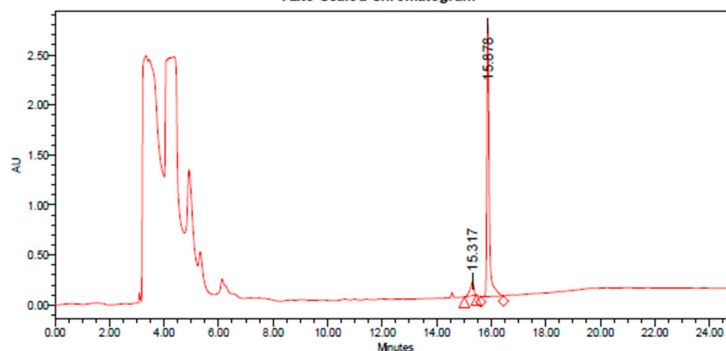

## Peak Results

|   | RT     | Area     | % Area | Height  |
|---|--------|----------|--------|---------|
| 1 | 15.317 | 1320549  | 7.46   | 144081  |
| 2 | 15.878 | 16361937 | 92.54  | 2747838 |

Reported by User: walkup  
Report Method: WalkUpReport  
Report Method ID: 1018  
Page: 1 of 1

Project Name: MedChemMedChem2021-04  
Date Printed: 4/28/2021  
3:02:27 PM America/New\_York

Figure S26. Compound 26.

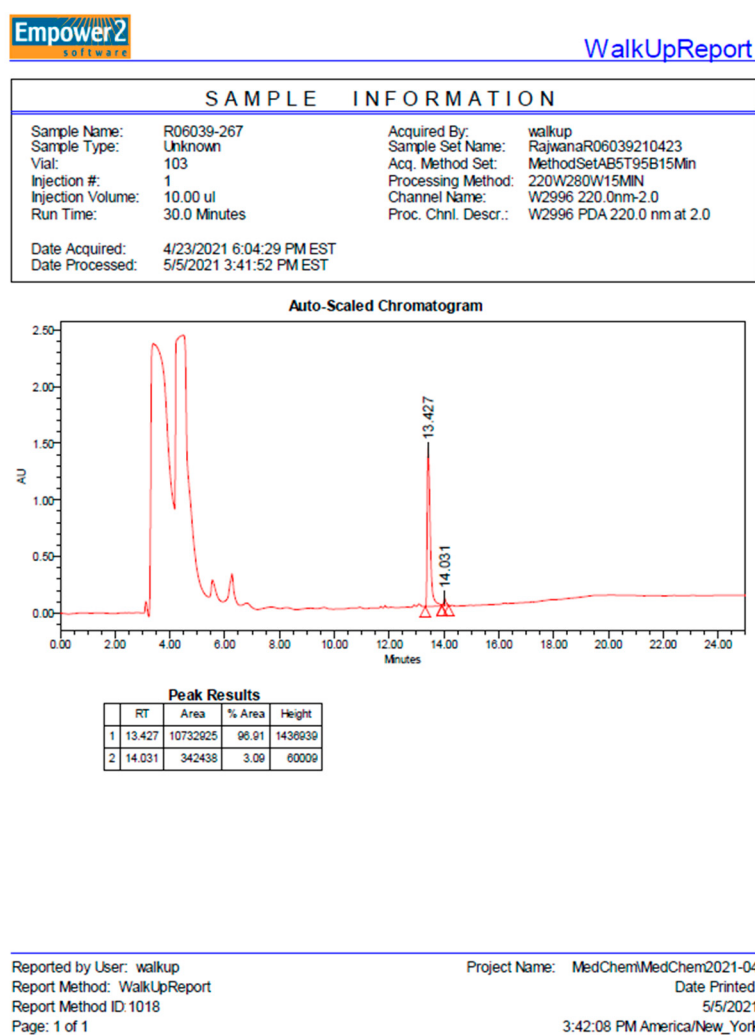

Figure S27. Compound 27.

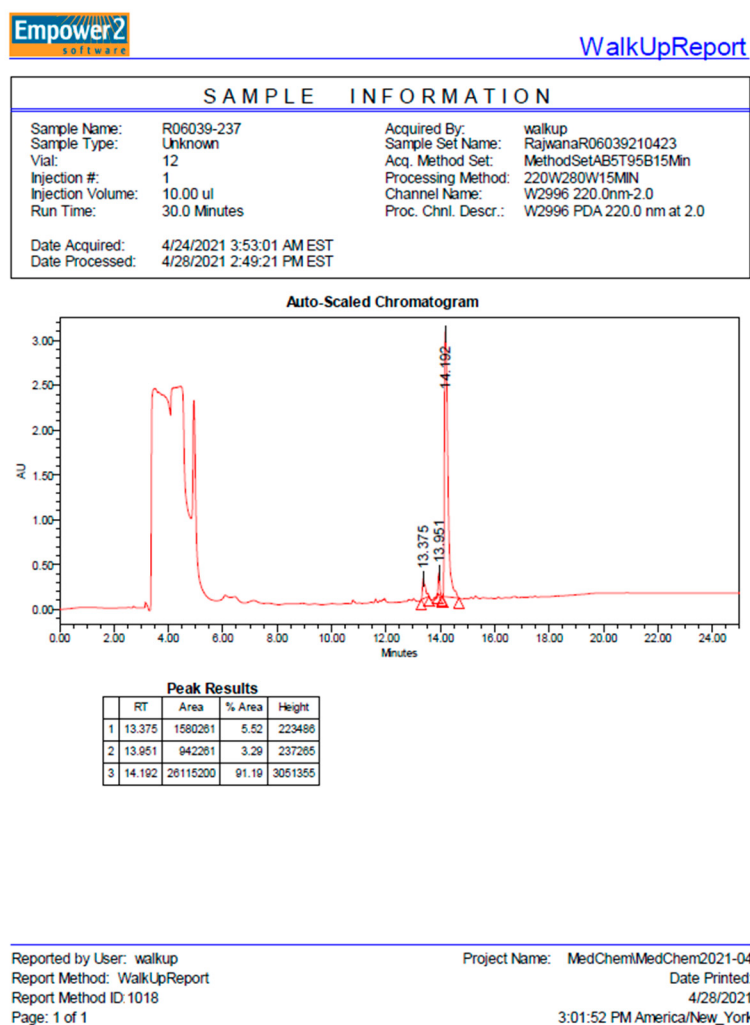

Figure S28. Compound 28.

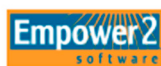

## WalkUpReport

## SAMPLE INFORMATION

|                   |                          |                     |                           |
|-------------------|--------------------------|---------------------|---------------------------|
| Sample Name:      | R06039-257               | Acquired By:        | walkup                    |
| Sample Type:      | Unknown                  | Sample Set Name:    | RajwanaR06039             |
| Vial:             | 48                       | Acq. Method Set:    |                           |
| Injection #:      | 1                        | Processing Method:  | 220W280W15MIN             |
| Injection Volume: | 20.00 ul                 | Channel Name:       | W2996 220.0nm-2.0         |
| Run Time:         | 30.0 Minutes             | Proc. Chnl. Descr.: | W2996 PDA 220.0 nm at 2.0 |
| Date Acquired:    | 4/29/2021 4:54:02 PM EST |                     |                           |
| Date Processed:   | 4/30/2021 4:03:53 PM EST |                     |                           |

## Auto-Scaled Chromatogram

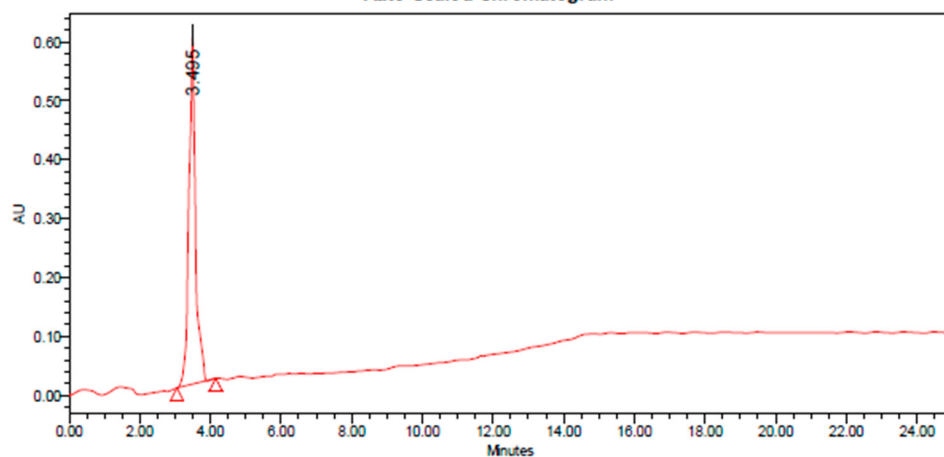

## Peak Results

|   | RT    | Area    | % Area | Height |
|---|-------|---------|--------|--------|
| 1 | 3.495 | 7635741 | 100.00 | 591338 |

Reported by User: walkup  
Report Method: WalkUpReport  
Report Method ID: 1018  
Page: 1 of 1

Project Name: MedChemMedChem2021-04  
Date Printed:  
4/30/2021  
4:08:08 PM America/New\_York

Figure S29. Compound 29.
